# Supplementary material for: Perilla frutescens seed oil combined with Anredera cordifolia leaf powder attenuates age-related cognitive decline by reducing serum triglyceride and glucose levels in healthy elderly Japanese individuals: a possible supplement for brain health
Source: Royal Society of Chemistry journal article supplement (doi:10.1039/d2fo00723a), 2022-01-01
Supplement: d2fo00723a1.pdf [file d2fo00723a1.pdf]

Supplement 1. Dietary intake evaluated by the BDHQ at baseline and after 12-months of intervention

|                                 | PO (n = 14)  |              | POAC (n = 17) |              | Change (12 months – baseline) |             |         |
|---------------------------------|--------------|--------------|---------------|--------------|-------------------------------|-------------|---------|
|                                 | Baseline     | 12 months    | Baseline      | 12 months    | PO                            | POAC        | P value |
| Energy (KJ / d)                 | 7026 ± 533   | 7291 ± 495   | 7041 ± 558    | 7832 ± 412   | 265 ± 469                     | 791 ± 527   | 0.572   |
| Protein (g / d)                 | 75.3 ± 9.4   | 75.4 ± 8.8   | 64.3 ± 4.9    | 68.7 ± 3.5   | 0.1 ± 5.7                     | 4.4 ± 4.5   | 0.536   |
| Fat (g / d)                     | 52.5 ± 6.6   | 52.3 ± 5.3   | 49.6 ± 4.3    | 53.0 ± 3.4   | -0.1 ± 5.9                    | 3.4 ± 4.1   | 0.809   |
| Carbohydrate (g / d)            | 214.8 ± 15.9 | 230.0 ± 12.0 | 215.9 ± 22.5  | 245.6 ± 17.1 | 15.1 ± 11.9                   | 29.7 ± 22.2 | 0.767   |
| Total dietary fiber (g / d)     | 13.6 ± 1.6   | 15.2 ± 2.4   | 12.0 ± 0.9    | 12.3 ± 1.0   | 1.5 ± 2.1                     | 0.3 ± 1.2   | 0.572   |
| Saturated fat (g / d)           | 13.4 ± 1.8   | 13.3 ± 1.6   | 12.6 ± 1.2    | 13.6 ± 1.0   | -0.1 ± 1.8                    | 1.0 ± 1.0   | 0.687   |
| Monounsaturated fat (g / d)     | 18.4 ± 2.3   | 18.2 ± 1.9   | 17.8 ± 1.6    | 18.6 ± 1.2   | -0.2 ± 2.3                    | 0.9 ± 1.5   | 0.893   |
| Polyunsaturated fat (g / d)     | 13.2 ± 1.5   | 13.5 ± 1.2   | 12.4 ± 1.0    | 13.4 ± 0.8   | 0.3 ± 1.0                     | 0.9 ± 1.1   | 0.936   |
| ω-6 polyunsaturated fat (g / d) | 10.1 ± 1.0   | 10.6 ± 0.9   | 10.1 ± 0.7    | 10.8 ± 0.7   | 0.4 ± 0.8                     | 0.7 ± 0.9   | 0.979   |
| ω-3 polyunsaturated fat (g / d) | 3.0 ± 0.5    | 2.9 ± 0.4    | 2.3 ± 0.2     | 2.5 ± 0.2    | -0.1 ± 0.2                    | 0.2 ± 0.2   | 0.434   |
| ALA (C18:3 ω-3) (g / d)         | 1.56 ± 0.16  | 1.68 ± 0.15  | 1.50 ± 0.13   | 1.59 ± 0.10  | 0.11 ± 0.14                   | 0.09 ± 0.15 | 0.851   |
| EPA (C20:5 ω-3) (g / d)         | 0.43 ± 0.10  | 0.38 ± 0.09  | 0.24 ± 0.04   | 0.27 ± 0.02  | -0.06 ± 0.04                  | 0.03 ± 0.04 | 0.058   |
| DHA (C22:6 ω-3) (g / d)         | 0.73 ± 0.17  | 0.62 ± 0.14  | 0.44 ± 0.06   | 0.51 ± 0.04  | -0.10 ± 0.07                  | 0.07 ± 0.06 | 0.095   |

Values are means ± SE. PO, perilla seed oil group; POAC, PO and *Anredera cordifolia* leaf powder group. ALA, α-linolenic acid; BDHQ, brief-type self-administered diet history questionnaire; d, day; DHA, docosahexaenoic acid; EPA, eicosapentaenoic acid.

## Supplement 2.

### Measurement of nutrient composition

Macronutrient composition was measured by the following methods: subtraction [ $100 - \{\text{moisture (g)} + \text{protein (g)} + \text{lipid (g)} + \text{ash (g)}\}$ ] to determine carbohydrate levels; the Kjeldahl method (nitrogen/protein conversion factor = 6.25) to measure protein content; and acid decomposition to measure fat levels<sup>1-3</sup>. Furthermore, the Prosky method was used to measure fiber content<sup>2-4</sup>; atomic absorption spectrophotometry for sodium<sup>2,3</sup>; HPLC for vitexin and adenosine<sup>2,3</sup>; gas chromatography for fatty acids<sup>5-8</sup>; the Folin-Ciocalteu method to measure polyphenol<sup>2,3</sup>; the direct incineration method for ash content<sup>2,3</sup>; and the oven-drying method to determine percent moisture content<sup>2,3</sup>. Energy was calculated by assuming 4 kcal/g protein, 4 kcal/g carbohydrate, and 9 kcal/g fat<sup>2,3</sup>.

### References

1. E.L. Kennaway, The Estimation of Non-Protein Nitrogen in Blood by a Micro-Kjeldahl Method. *Biochem. J.*, 1921, **15**(4), 510-512.
2. K. Maruyama, K. Arai, T. Sakakiyama, K. Yoshino and K. Kajima, Anredera cordifolia Water Extract Effectively Ameliorates Metabolic Syndrome Abnormalities in High Fructose – Fed Mouse Model, *Pharmacometrics*, 2014, 87(1/2), 21-24.
3. K. Maruyama, M. Yamada, K. Yamauchi, K. Yoshino and K. Kajima, Anredera cordiifolia Water Extract Effectively Decrease in Vivo Oxidative Stress in High Fructose – Fed Mouse Model, *Pharmacometrics*, 2015, 88(3/4), 47-51.
4. L. Prosky, N.G. Asp, I. Furda, J.W. DeVries, T.F. Schweizer, B.F. Harland, Determination of total dietary fiber in foods and food products: collaborative study. *J. Assoc. Off. Anal. Chem.*, 1985, **68**(4), 677-679.
5. T. Ichinose, K. Matsuzaki, M. Kato, Y. Tanabe, N. Tachibana, M. Morikawa, S. Kato, S. Ohata, M. Ohno, H. Wakatsuki, S. Hossain, O. Shido and M. Hashimoto, Intake of Docosahexaenoic Acid-Enriched Milk Beverage Prevents Age-Related Cognitive Decline and Decreases Serum Bone Resorption Marker Levels, *J. Oleo. Sci.*, 2021, 70, 1829-1838.
6. M. Hashimoto, K. Matsuzaki, S. Hossain, T. Ito, H. Wakatsuki, Y. Tanabe, M. Ohno, S. Kato, K. Yamashita and O. Shido, Perilla Seed Oil Enhances Cognitive Function and Mental Health in Healthy Elderly Japanese Individuals by Enhancing the Biological Antioxidant Potential, *Foods*, 2021, 10, 1130.
7. M. Hashimoto, K. Matsuzaki, K. Maruyama, S. Hossain, E. Sumiyoshi, H. Wakatsuki, S. Kato, M. Ohno, Y. Tanabe, Y. Kuroda, S. Yamaguchi, K. Kajima, Y. Ohizumi and O. Shido, Perilla seed oil in combination with nobiletin-rich ponkan powder enhances cognitive function in healthy elderly Japanese individuals: a possible supplement for brain health in the elderly, *Food Funct.*, 2022, 13, 2768-2781.
8. M. Hashimoto, K. Matsuzaki, S. Kato, S. Hossain, M. Ohno and O. Shido, Twelve-month Studies on Perilla Oil Intake in Japanese Adults-Possible Supplement for Mental Health, *Foods*, 2020, 9, 530.
